# Supplementary material for: Ab initio investigation of the ground and excited states of RuO+,0,− and their reaction with water
Source: Royal Society of Chemistry journal article supplement (doi:10.1039/d0cp02468f), 2020-01-01
Supplement: d0cp02468f1.pdf [file d0cp02468f1.pdf]

**Electronic Supplementary Information**

*Ab initio investigation of the ground and excited states of  
 $RuO^{+,0,-}$  and their reaction with water*

Isuru R. Ariyaratna, Nuno M. S. Almeida, and Evangelos Miliordos\*

Department of Chemistry and Biochemistry, Auburn University,  
Auburn, AL 36849, USA

\* To whom correspondence should be addressed. E-mail: [emiliord@auburn.edu](mailto:emiliord@auburn.edu)

**Table S1.** Dominant electronic configurations for the lowest electronic states of RuO<sup>+</sup>. 1 $\sigma^2$  (~2s<sub>o</sub>) is implied for all states, and MOs are shown in Figure 2.

| State                         | Coef. | 2 $\sigma$ | 3 $\sigma$ | 4 $\sigma$ | 1 $\pi_x$ | 2 $\pi_x$ | 1 $\pi_y$ | 2 $\pi_y$ | 1 $\delta_{x^2-y^2}$ | 1 $\delta_{xy}$ |
|-------------------------------|-------|------------|------------|------------|-----------|-----------|-----------|-----------|----------------------|-----------------|
| X <sup>2</sup> Π              | 0.89  | 2          | 0          | 0          | 2         | α         | 2         | 0         | 2                    | 2               |
| 1 <sup>4</sup> Δ              | 0.95  | 2          | 0          | 0          | 2         | α         | 2         | α         | 2                    | α               |
| 1 <sup>6</sup> Σ <sup>+</sup> | 0.94  | 2          | α          | 0          | 2         | α         | 2         | α         | α                    | α               |
| 1 <sup>4</sup> Φ              | 0.66  | 2          | α          | 0          | 2         | 0         | 2         | α         | 2                    | α               |
|                               | -0.66 | 2          | α          | 0          | 2         | α         | 2         | 0         | α                    | 2               |
| 1 <sup>4</sup> Π              | 0.66  | 2          | α          | 0          | 2         | 0         | 2         | α         | 2                    | α               |
|                               | 0.66  | 2          | α          | 0          | 2         | α         | 2         | 0         | α                    | 2               |
| 1 <sup>2</sup> Σ <sup>+</sup> | 0.89  | 2          | α          | 0          | 2         | 0         | 2         | 0         | 2                    | 2               |
| 1 <sup>2</sup> Γ              | 0.47  | 2          | 0          | 0          | 2         | 0         | 2         | 2         | 2                    | α               |
|                               | -0.47 | 2          | 0          | 0          | 2         | 2         | 2         | 0         | 2                    | α               |
|                               | 0.47  | 2          | 0          | 0          | 2         | β         | 2         | α         | α                    | 2               |
|                               | -0.47 | 2          | 0          | 0          | 2         | α         | 2         | β         | α                    | 2               |
| 1 <sup>2</sup> Δ              | 0.67  | 2          | 0          | 0          | 2         | α         | 2         | α         | 2                    | β               |
|                               | -0.34 | 2          | 0          | 0          | 2         | β         | 2         | α         | 2                    | α               |
|                               | -0.34 | 2          | 0          | 0          | 2         | α         | 2         | β         | 2                    | α               |
|                               | 0.31  | 2          | 0          | 0          | 2         | 0         | 2         | 2         | α                    | 2               |
|                               | 0.31  | 2          | 0          | 0          | 2         | 2         | 2         | 0         | α                    | 2               |
| 1 <sup>2</sup> Σ <sup>-</sup> | -0.46 | 2          | 0          | 0          | 2         | 0         | 2         | 2         | 2                    | α               |
|                               | 0.46  | 2          | 0          | 0          | 2         | 2         | 2         | 0         | 2                    | α               |
|                               | 0.46  | 2          | 0          | 0          | 2         | β         | 2         | α         | α                    | 2               |
|                               | -0.46 | 2          | 0          | 0          | 2         | α         | 2         | β         | α                    | 2               |
| 1 <sup>2</sup> Σ <sup>+</sup> | -0.46 | 2          | 0          | 0          | 2         | β         | 2         | α         | 2                    | α               |
|                               | 0.46  | 2          | 0          | 0          | 2         | α         | 2         | β         | 2                    | α               |
|                               | -0.46 | 2          | 0          | 0          | 2         | 0         | 2         | 2         | α                    | 2               |
|                               | 0.46  | 2          | 0          | 0          | 2         | 2         | 2         | 0         | α                    | 2               |
| 1 <sup>2</sup> Φ              | -0.54 | 2          | α          | 0          | 2         | β         | 2         | 0         | α                    | 2               |
|                               | 0.54  | 2          | α          | 0          | 2         | 0         | 2         | β         | 2                    | α               |
|                               | -0.31 | 2          | β          | 0          | 2         | 0         | 2         | α         | 2                    | α               |
|                               | 0.31  | 2          | β          | 0          | 2         | α         | 2         | 0         | α                    | 2               |
| 2 <sup>2</sup> Π              | 0.49  | 2          | α          | 0          | 2         | β         | 2         | 0         | α                    | 2               |
|                               | 0.49  | 2          | α          | 0          | 2         | 0         | 2         | β         | 2                    | α               |
|                               | -0.42 | 2          | β          | 0          | 2         | 0         | 2         | α         | 2                    | α               |
|                               | -0.42 | 2          | β          | 0          | 2         | α         | 2         | 0         | α                    | 2               |
| 1 <sup>4</sup> Σ <sup>+</sup> | 0.49  | 2          | α          | 0          | 2         | α         | 2         | β         | α                    | α               |
|                               | 0.49  | 2          | α          | 0          | 2         | β         | 2         | α         | α                    | α               |
| 2 <sup>2</sup> Δ              | 0.51  | 2          | 2          | 0          | 2         | 0         | 2         | 0         | 2                    | α               |
|                               | -0.45 | 2          | 0          | 0          | 2         | 0         | 2         | 2         | 2                    | α               |
|                               | -0.45 | 2          | 0          | 0          | 2         | 2         | 2         | 0         | 2                    | α               |
| 2 <sup>4</sup> Δ              | 0.64  | 2          | α          | 0          | 2         | 0         | 2         | 2         | α                    | α               |
|                               | -0.64 | 2          | α          | 0          | 2         | 2         | 2         | 0         | α                    | α               |
| 1 <sup>6</sup> Φ              | 0.68  | 2          | α          | 0          | α         | α         | 2         | α         | 2                    | α               |
|                               | -0.68 | 2          | α          | 0          | 2         | α         | α         | α         | α                    | 2               |

**Table S2.** Spin-orbit energies for the lowest electronic states of RuO<sup>+</sup> at 1.70 Å at MRCI level.

| State                                      | Energy (Hartrees) | Energy difference (eV) |
|--------------------------------------------|-------------------|------------------------|
| <sup>4</sup> Δ <sub>7/2</sub>              | -168.86142175     | 0.00                   |
| <sup>4</sup> Δ <sub>5/2</sub>              | -168.85922958     | 0.06                   |
| <sup>2</sup> Π <sub>1/2</sub>              | -168.85816254     | 0.09                   |
| <sup>4</sup> Δ <sub>3/2</sub>              | -168.85735155     | 0.11                   |
| <sup>2</sup> Π <sub>3/2</sub>              | -168.85138566     | 0.27                   |
| <sup>4</sup> Δ <sub>1/2</sub>              | -168.85126486     | 0.28                   |
| <sup>4</sup> Π <sub>5/2</sub>              | -168.85017263     | 0.31                   |
| <sup>4</sup> Π <sub>3/2</sub>              | -168.84641495     | 0.41                   |
| <sup>4</sup> Φ <sub>9/2</sub>              | -168.84634768     | 0.41                   |
| <sup>4</sup> Φ <sub>7/2</sub>              | -168.84450314     | 0.46                   |
| <sup>4</sup> Π <sub>1/2</sub>              | -168.84352223     | 0.49                   |
| <sup>4</sup> Φ <sub>5/2</sub>              | -168.84274472     | 0.51                   |
| <sup>4</sup> Φ <sub>3/2</sub>              | -168.84108667     | 0.55                   |
| <sup>4</sup> Π <sub>1/2</sub>              | -168.84002043     | 0.58                   |
| <sup>6</sup> Σ <sup>+</sup> <sub>3/2</sub> | -168.83858745     | 0.62                   |
| <sup>6</sup> Σ <sup>+</sup> <sub>5/2</sub> | -168.83849890     | 0.62                   |
| <sup>6</sup> Σ <sup>+</sup> <sub>1/2</sub> | -168.83843296     | 0.63                   |
| <sup>2</sup> Σ <sup>+</sup> <sub>1/2</sub> | -168.82918404     | 0.88                   |

**Table S3.** Dominant electronic configurations for the lowest electronic states of RuO.  $1\sigma^2$  ( $\sim 2s_0$ ) is implied for all states, and MOs are shown in Figure 2.

| State         | Coef. | $2\sigma$ | $3\sigma$ | $4\sigma$ | $1\pi_x$ | $2\pi_x$ | $1\pi_y$ | $2\pi_y$ | $1\delta_{x^2-y^2}$ | $1\delta_{xy}$ |
|---------------|-------|-----------|-----------|-----------|----------|----------|----------|----------|---------------------|----------------|
| $X^5\Delta$   | 0.95  | 2         | $\alpha$  | 0         | 2        | $\alpha$ | 2        | $\alpha$ | 2                   | $\alpha$       |
| $1^3\Pi$      | 0.80  | 2         | $\alpha$  | 0         | 2        | $\alpha$ | 2        | 0        | 2                   | 2              |
| $1^3\Delta$   | 0.79  | 2         | $\beta$   | 0         | 2        | $\alpha$ | 2        | $\alpha$ | 2                   | $\alpha$       |
|               | -0.41 | 2         | $\alpha$  | 0         | 2        | $\beta$  | 2        | $\alpha$ | 2                   | $\alpha$       |
|               | -0.41 | 2         | $\alpha$  | 0         | 2        | $\alpha$ | 2        | $\beta$  | 2                   | $\alpha$       |
| $1^1\Sigma^+$ | 0.92  | 2         | 2         | 0         | 2        | 0        | 2        | 0        | 2                   | 2              |
| $1^1\Pi$      | 0.60  | 2         | $\beta$   | 0         | 2        | $\alpha$ | 2        | 0        | 2                   | 2              |
|               | -0.60 | 2         | $\alpha$  | 0         | 2        | $\beta$  | 2        | 0        | 2                   | 2              |
| $1^3\Gamma$   | 0.56  | 2         | $\alpha$  | 0         | 2        | $\alpha$ | 2        | $\beta$  | 2                   | $\alpha$       |
|               | 0.46  | 2         | $\alpha$  | 0         | 2        | 2        | 2        | 0        | $\alpha$            | 2              |
|               | -0.46 | 2         | $\alpha$  | 0         | 2        | 0        | 2        | 2        | $\alpha$            | 2              |
| $1^3\Phi$     | 0.63  | 2         | 2         | 0         | 2        | $\alpha$ | 2        | 0        | $\alpha$            | 2              |
|               | 0.63  | 2         | 2         | 0         | 2        | 0        | 2        | $\alpha$ | 2                   | $\alpha$       |
| $1^5\Sigma^+$ | 0.93  | 2         | 2         | 0         | 2        | $\alpha$ | 2        | $\alpha$ | $\alpha$            | $\alpha$       |
| $1^3\Sigma^-$ | 0.50  | 2         | $\alpha$  | 0         | 2        | $\alpha$ | 2        | $\beta$  | $\alpha$            | 2              |
|               | -0.43 | 2         | $\alpha$  | 0         | 2        | 0        | 2        | 2        | 2                   | $\alpha$       |
|               | 0.43  | 2         | $\alpha$  | 0         | 2        | 2        | 2        | 0        | 2                   | $\alpha$       |
| $2^3\Pi$      | 0.52  | 2         | $\alpha$  | 0         | 2        | $\alpha$ | 2        | 0        | 2                   | 2              |
|               | 0.51  | 2         | 2         | 0         | 2        | 0        | 2        | $\alpha$ | 2                   | $\alpha$       |
|               | -0.51 | 2         | 2         | 0         | 2        | $\alpha$ | 2        | 0        | $\alpha$            | 2              |
| $2^3\Sigma^-$ | 0.81  | 2         | 0         | 0         | 2        | $\alpha$ | 2        | $\alpha$ | 2                   | 2              |
| $1^3\Sigma^+$ | -0.32 | $\alpha$  | 2         | 0         | 2        | $\beta$  | 2        | $\alpha$ | 2                   | $\alpha$       |
|               | 0.56  | $\alpha$  | 2         | 0         | 2        | $\alpha$ | 2        | $\beta$  | 2                   | $\alpha$       |
|               | -0.45 | $\alpha$  | $\alpha$  | 0         | 2        | 0        | 2        | 2        | 2                   | 2              |
|               | 0.45  | $\alpha$  | $\alpha$  | 0         | 2        | 2        | 2        | 0        | 2                   | 2              |
| $2^3\Delta$   | 0.53  | $\alpha$  | $\alpha$  | 0         | 2        | 0        | 2        | 2        | 2                   | 2              |
|               | 0.53  | $\alpha$  | $\alpha$  | 0         | 2        | 2        | 2        | 0        | 2                   | 2              |
| $1^1\Delta$   | 0.49  | 2         | $\alpha$  | 0         | 2        | $\beta$  | 2        | $\beta$  | $\alpha$            | 2              |
|               | 0.49  | 2         | $\beta$   | 0         | 2        | $\alpha$ | 2        | $\alpha$ | $\beta$             | 2              |

**Table S4.** Spin-orbit energies for the lowest electronic states of RuO at 1.70 Å at MRCI level.

| State             | Energy (Hartrees) | Energy difference<br>(eV) |
|-------------------|-------------------|---------------------------|
| $^5\Delta_4$      | -169.1554527      | 0.00                      |
| $^5\Delta_3$      | -169.1535351      | 0.05                      |
| $^5\Delta_2$      | -169.1518288      | 0.10                      |
| $^5\Delta_1$      | -169.1499812      | 0.15                      |
| $^5\Delta_{0+}$   | -169.1484284      | 0.19                      |
| $^5\Delta_{0-}$   | -169.1484166      | 0.19                      |
| $^3\Pi_1$         | -169.1293541      | 0.71                      |
| $^3\Pi_{0+}$      | -169.1292645      | 0.71                      |
| $^3\Pi_{0-}$      | -169.1288716      | 0.72                      |
| $^3\Pi_2$         | -169.1288646      | 0.72                      |
| $^3\Delta_3$      | -169.1216192      | 0.92                      |
| $^3\Delta_2$      | -169.1173184      | 1.04                      |
| $^3\Delta_1$      | -169.1151332      | 1.10                      |
| $^3\Gamma_5$      | -169.1145857      | 1.11                      |
| $^3\Gamma_4$      | -169.1126878      | 1.16                      |
| $^3\Phi_1$        | -169.1097962      | 1.24                      |
| $^1\Pi_1$         | -169.1094300      | 1.25                      |
| $^3\Gamma_3$      | -169.1090370      | 1.26                      |
| $^3\Sigma^-_{0+}$ | -169.1069723      | 1.32                      |
| $^3\Sigma^-_1$    | -169.1066534      | 1.33                      |
| $^3\Phi_2$        | -169.1064445      | 1.33                      |
| $^3\Phi_3$        | -169.1056745      | 1.35                      |
| $^5\Sigma^+_{2+}$ | -169.1041079      | 1.40                      |
| $^5\Sigma^+_{1+}$ | -169.1034939      | 1.41                      |
| $^5\Sigma^+_{0+}$ | -169.1033202      | 1.42                      |

**Table S5.** MRCI optimal geometries (Cartesian coordinates in Å) of the reactants, transition state, and products of the RuO + H<sub>2</sub>O → Ru(OH)<sub>2</sub> reaction for the first two quintets (1<sup>5</sup>A, 2<sup>5</sup>A), the first four triplet (1<sup>3</sup>A, 2<sup>3</sup>A, 3<sup>3</sup>A, 4<sup>3</sup>A), and the first singlet (1<sup>1</sup>A) states.

|                  | Reactants |               |               |               | Transition State |               |               |               | Products |               |               |               |
|------------------|-----------|---------------|---------------|---------------|------------------|---------------|---------------|---------------|----------|---------------|---------------|---------------|
| 1 <sup>5</sup> A | Ru        | 0.1597804677  | 0.1623007048  | 0.1582543344  | Ru               | 0.6254154857  | 0.0047848187  | -0.1786618408 | Ru       | -0.0000000000 | -0.0000000000 | -0.0079837670 |
|                  | O         | -1.5320762648 | 0.2834936180  | 0.1594956641  | O                | -0.3663310005 | 1.5227326523  | -0.0900564245 | O        | -0.0396575603 | 1.9203263554  | -0.0079837670 |
|                  | O         | 2.4443619857  | 0.0054447139  | 0.1420322867  | O                | -1.5545677686 | -0.4783223626 | 0.1980892435  | O        | 0.0396575603  | -1.9203263554 | -0.0079837670 |
|                  | H         | 2.9802106979  | 0.6896882915  | 0.5287380877  | H                | -1.2399163461 | 0.7152313667  | 0.1118874754  | H        | 0.4834729671  | 2.5003330149  | 0.5270106791  |
|                  | H         | 2.8907348248  | -0.8199324552 | 0.2977241337  | H                | -1.8745161242 | -0.6844991220 | 1.0676124082  | H        | -0.4834729671 | -2.5003330149 | 0.5270106791  |
| 2 <sup>5</sup> A | Ru        | 0.0807234607  | 0.1515772933  | 0.2369975398  | Ru               | 0.5479568674  | -0.0882491349 | -0.0500685721 | Ru       | -0.0002633944 | 0.0424986808  | 0.0008489593  |
|                  | O         | -1.6013090692 | 0.2696490786  | 0.0533811726  | O                | -0.3802035230 | 1.4554802406  | 0.0032414712  | O        | -1.9181162259 | -0.0074050560 | 0.0839236871  |
|                  | O         | 2.3544547051  | -0.0081669373 | 0.4672956361  | O                | -1.7108882071 | -0.5760541217 | -0.0536031028 | O        | 1.9176073913  | -0.0075865042 | -0.0815292366 |
|                  | H         | 2.8236577655  | 0.4750942340  | 1.1390244724  | H                | -1.3743475269 | 0.6597651950  | 0.0148002411  | H        | -2.5281622582 | 0.5122782842  | -0.4200322790 |
|                  | H         | 2.7881800032  | -0.8498234952 | 0.3753917297  | H                | -2.3035066103 | -0.8191781788 | 0.6793419626  | H        | 2.5273644864  | 0.5193756714  | 0.4151688690  |
| 1 <sup>3</sup> A | Ru        | 0.3028008357  | 0.1584650854  | -0.2512400199 | Ru               | 0.4273108744  | -0.1606414752 | 0.0002646837  | Ru       | -0.0000000000 | -0.0000000000 | -0.0061429588 |
|                  | O         | -1.1873792982 | 0.2382758057  | 0.4527066394  | O                | -0.3760781594 | 1.4447856828  | 0.0338348247  | O        | -0.0478326879 | 1.9013303154  | -0.0061429588 |
|                  | O         | 2.4821281599  | 0.0067805178  | -0.1048069363 | O                | -1.6644454147 | -0.4790217553 | -0.1023756819 | O        | 0.0478326879  | -1.9013303154 | -0.0061429588 |
|                  | H         | 2.9771815994  | 0.7407945497  | 0.2425859822  | H                | -1.4623832462 | 0.6136870580  | -0.0323718872 | H        | 0.5831149289  | 2.4756954250  | 0.4054984193  |
|                  | H         | 2.8735035439  | -0.7921025112 | 0.2317648793  | H                | -2.0891240541 | -0.7606865104 | 0.7055490607  | H        | -0.5831149289 | -2.4756954250 | 0.4054984193  |
| 2 <sup>3</sup> A | Ru        | 0.3472419140  | 0.1414003459  | 0.0797003974  | Ru               | 0.4444459332  | -0.1551941346 | 0.0000135590  | Ru       | 0.0000000000  | -0.0000000000 | -0.0000000000 |
|                  | O         | -1.3855820457 | 0.2625654282  | 0.2569668567  | O                | -0.3773581819 | 1.4418873187  | 0.0226831402  | O        | 0.0000000000  | -0.0560856158 | 1.9158183285  |
|                  | O         | 2.5240771766  | 0.0021678386  | -0.1422577948 | O                | -1.6729015147 | -0.4748688472 | -0.0963458378 | O        | 0.0000000000  | 0.0560856158  | -1.9158183285 |
|                  | H         | 3.0257513241  | 0.7399420154  | 0.1944851508  | H                | -1.4552507295 | 0.6202702803  | -0.0236378642 | H        | 0.0000000000  | 0.6788383987  | 2.5125136639  |
|                  | H         | 2.9367464718  | -0.7938621806 | 0.1821159346  | H                | -2.1036555071 | -0.7739716172 | 0.7021880028  | H        | 0.0000000000  | -0.6788383987 | -2.5125136639 |
| 3 <sup>3</sup> A | Ru        | 0.0000000000  | -0.0001543387 | 0.1138503939  | Ru               | 0.4132513520  | -0.1546456107 | 0.0051630660  | Ru       | 0.0000000000  | -0.0000000000 | -0.0000000000 |
|                  | O         | 0.0000000000  | 0.0007962603  | 1.7617039964  | O                | -0.4072649281 | 1.4221235297  | 0.0369615295  | O        | 0.0000000000  | -0.0562338192 | 1.9178097192  |
|                  | O         | -0.0000000000 | -0.0014551164 | -2.1410344929 | O                | -1.6903297569 | -0.5045858908 | -0.1139966089 | O        | 0.0000000000  | 0.0562338192  | -1.9178097192 |
|                  | H         | 0.7704512071  | 0.0129671962  | -2.6974814806 | H                | -1.4015776274 | 0.6625452224  | -0.0421442247 | H        | 0.0000000000  | 0.6818367394  | 2.5106820198  |
|                  | H         | -0.7704512071 | 0.0129671962  | -2.6974814806 | H                | -2.0787990396 | -0.7673142507 | 0.7189172380  | H        | 0.0000000000  | -0.6818367394 | -2.5106820198 |
| 4 <sup>3</sup> A | Ru        | 0.2539392989  | 0.1541293658  | -0.1534379511 | Ru               | 0.4277131507  | -0.1658767747 | -0.0022851238 | Ru       | 0.1501335000  | -0.1830910660 | 0.0849376059  |
|                  | O         | -1.3611075848 | 0.2551610168  | 0.3620545358  | O                | -0.3918058138 | 1.4552295860  | 0.0432172583  | O        | 0.2596118282  | -0.0354343415 | 1.9832183314  |
|                  | O         | 2.4809433501  | 0.0051851769  | 0.1668652004  | O                | -1.6768541756 | -0.4923475793 | -0.1084177875 | O        | 0.2066317965  | -0.1449339472 | -1.8210294002 |
|                  | H         | 3.0880022078  | 0.7337874922  | 0.1047096108  | H                | -1.4358672139 | 0.6163578363  | -0.0408934535 | H        | -0.1953792346 | -0.6173373713 | 2.5786556680  |
|                  | H         | 2.9864575688  | -0.7960496043 | 0.0908191488  | H                | -2.0879059475 | -0.7552400684 | 0.7132801064  | H        | -0.2643909239 | -0.7599415413 | -2.3688314941 |
| 1 <sup>1</sup> A | Ru        | 0.3156197420  | 0.1426107944  | 0.4428148854  | Ru               | 0.4889993499  | -0.0434753815 | -0.1042059419 | Ru       | -0.3276412162 | -0.0596608404 | 0.0063160945  |
|                  | O         | -1.2474258266 | 0.2546471863  | -0.0298245743 | O                | -0.3526301217 | 1.4866105925  | -0.0840132031 | O        | 0.0841708125  | -0.1016958308 | 1.8188534191  |
|                  | O         | 2.4945033819  | 0.0008369005  | 0.2767338972  | O                | -1.5089795412 | -0.4480656964 | 0.1589031306  | O        | 0.0454766914  | 0.1065676329  | -1.8072837103 |
|                  | H         | 2.9887805415  | 0.7448673433  | -0.0523637068 | H                | -1.2928679804 | 0.7676084728  | 0.0896365859  | H        | 0.2419441203  | 0.6695312227  | 2.3497936902  |
|                  | H         | 2.8967575384  | -0.7907487523 | -0.0663499160 | H                | -1.7444377776 | -0.6827505563 | 1.0485503699  | H        | 0.4289064897  | -0.5779133319 | -2.3422630540 |

The grey highlighted TS are optimized at MRCI/cc-pVDZ-PP(Ru) cc-pVDZ(H) aug-cc-pVDZ(O). All other structures are optimized at MRCI/cc-pVTZ-PP(Ru) cc-pVTZ(H) aug-cc-pVTZ(O).

**Table S6.** Total energies (a.u.) of optimal geometries of the reactants, transition state, and products of the  $\text{RuO} + \text{H}_2\text{O} \rightarrow \text{Ru}(\text{OH})_2$  reaction for the first two quintets ( $1^5\text{A}$ ,  $2^5\text{A}$ ), the first four triplet ( $1^3\text{A}$ ,  $2^3\text{A}$ ,  $3^3\text{A}$ ,  $4^3\text{A}$ ), and the first singlet ( $1^1\text{A}$ ) states.

| State         | Total energy of RuO + H <sub>2</sub> O reacting products (a.u.) |             |             |             |             |             |
|---------------|-----------------------------------------------------------------|-------------|-------------|-------------|-------------|-------------|
|               | Intermediate                                                    |             | TS          |             | Products    |             |
|               | MRCI                                                            | MRCI+Q      | MRCI        | MRCI+Q      | MRCI        | MRCI+Q      |
| $1^5\text{A}$ | -245.380595                                                     | -245.481342 | -245.336644 | -245.434783 | -245.444645 | -245.533297 |
| $2^5\text{A}$ | -245.380567                                                     | -245.481273 | -245.329243 | -245.428893 | -245.444698 | -245.533234 |
| $1^3\text{A}$ | -245.351600                                                     | -245.458504 | -245.333034 | -245.436714 | -245.403830 | -245.494451 |
| $2^3\text{A}$ | -245.364523                                                     | -245.457565 | -245.325976 | -245.429525 | -245.393832 | -245.484247 |
| $3^3\text{A}$ | -245.346647                                                     | -245.454583 | -245.323614 | -245.427430 | -245.393624 | -245.483946 |
| $4^3\text{A}$ | -245.330938                                                     | -245.438278 | -245.312765 | -245.416998 | -245.390701 | -245.484407 |
| $1^1\text{A}$ | -245.329479                                                     | -245.438740 | -245.317217 | -245.422845 | -245.389835 | -245.484635 |

**Table S7.** Harmonic vibrational frequencies ( $\text{cm}^{-1}$ ) of MRCI optimal geometries given in Table S5.

|               | Reactants                                                         | Transition States                                                  | Products                                                        |
|---------------|-------------------------------------------------------------------|--------------------------------------------------------------------|-----------------------------------------------------------------|
| $1^5\text{A}$ | 119.8, 140.5, 286.5, 341.8, 560.0, 973.4, 1703.7, 3985.7, 4080.2  | 1713.2i, 278.7, 445.9, 575.4, 681.8, 813.9, 1400.5, 1972.5, 4018.7 | 37.1, 107.9, 380.4, 617.4, 658.4, 749.4, 769.0, 4059.3, 4114.5  |
| $2^5\text{A}$ | 22.9, 141.7, 282.4, 384.1, 514.6, 970.8, 1704.7, 3976.5, 4080.0   | 1912.5i, 217.2, 511.8, 754.3, 800.9, 894.8, 1436.7, 1707.5, 3709.3 | 55.7, 143.2, 170.7, 559.2, 596.5, 669.1, 685.7, 4078.8, 4095.7  |
| $1^3\text{A}$ | 91.4 223.9, 312.8, 337.5, 525.4, 965.0, 1702.2, 3980.9, 4076.3    | 1020.7i, 387.0, 620.5, 727.5, 756.0, 827.9, 1526.2, 1973.5, 4014.3 | 125.8, 149.7, 170.5, 616.7, 627.0, 657.5, 685.0, 4069.6, 4073.1 |
| $2^3\text{A}$ | 86.5, 135.9, 325.5, 376.3, 484.8, 749.0, 1678.3, 3948.7, 4043.7   | 1107.1i, 356.0, 570.3, 673.0, 743.2, 824.7, 1499.8, 1961.3, 4017.6 | 132.4, 187.1, 413.6, 494.9, 645.2, 719.7, 800.5, 4068.9, 4072.4 |
| $3^3\text{A}$ |                                                                   | 1732.1i, 364.4, 605.9, 626.5, 724.7, 818.9, 1433.5, 1884.3, 4006.0 | 141.0, 182.7, 408.9, 476.4, 643.3, 713.6, 801.6, 4068.1, 4071.3 |
| $4^3\text{A}$ | 161.4, 205.1, 224.1, 291.0, 444.8, 1347.8, 1702.3, 3991.3, 4083.9 | 1316.2i, 363.5, 608.3, 674.8, 734.1, 802.4, 1483.5, 1911.9, 4008.9 | 79.6, 206.8, 574.5, 595.3, 657.0, 741.1, 1316.2, 4038.5, 4052.6 |
| $1^1\text{A}$ | 77.4, 207.7, 306.2, 339.4, 500.0, 1057.7, 1697.0, 3968.9, 4063.2  | 1624.5i, 450.6, 634.2, 668.2, 764.2, 876.1, 1459.8, 1944.9, 4034.1 | 88.7, 455.1, 542.6, 673.5, 687.9, 807.5, 844.0, 4021.8, 4025.6  |

**Table S8.** MRCI optimal geometries (Cartesian coordinates in Å) of the reactants, transition state, and products of the RuO<sup>+</sup> + H<sub>2</sub>O → Ru(OH)<sub>2</sub><sup>+</sup> reaction for the first four quartet (1<sup>4</sup>A, 2<sup>4</sup>A, 3<sup>4</sup>A, 4<sup>4</sup>A), the first two doublet (1<sup>2</sup>A, 2<sup>2</sup>A), and the first sextet (1<sup>6</sup>A) states.

|                  | Reactants |               |               |              | Transition State |               |               |               | Products                                                                           |               |               |               |
|------------------|-----------|---------------|---------------|--------------|------------------|---------------|---------------|---------------|------------------------------------------------------------------------------------|---------------|---------------|---------------|
| 1 <sup>4</sup> A | Ru        | 0.1500735406  | 0.1602156348  | 0.1941391774 | Ru               | 0.4567300323  | -0.0482134207 | -0.0961909985 | Ru                                                                                 | -0.0019797675 | 0.0005203754  | 0.1371797952  |
|                  | O         | -1.4847276681 | 0.2834759158  | 0.1153230870 | O                | -0.3308802486 | 1.4786873267  | -0.1008730909 | O                                                                                  | -0.0223978534 | 1.8097061139  | 0.0899495880  |
|                  | O         | 2.3802988460  | -0.0123453925 | 0.3022890347 | O                | -1.4728695039 | -0.4541577253 | 0.1777195534  | O                                                                                  | 0.0230642817  | -1.8087064727 | 0.0938036086  |
|                  | H         | 2.9978582937  | 0.6990780702  | 0.4606205934 | H                | -1.3011244705 | 0.8303818889  | 0.0809293941  | H                                                                                  | 0.4864119710  | 2.5725818012  | 0.3557404915  |
|                  | H         | 2.8995086993  | -0.8094293553 | 0.2138726141 | H                | -1.7617718803 | -0.7267706385 | 1.0472860833  | H                                                                                  | -0.4850986318 | -2.5741018177 | 0.3533966480  |
| 2 <sup>4</sup> A | Ru        | 0.1498614531  | 0.1601218213  | 0.1941303829 | Ru               | 0.4625067273  | -0.0446422799 | -0.1001005053 | Ru                                                                                 | -0.0023797791 | 0.0006449307  | 0.1361641354  |
|                  | O         | -1.4849039792 | 0.2834998951  | 0.1153030811 | O                | -0.3112839397 | 1.5075914919  | -0.1371938158 | O                                                                                  | -0.0215119368 | 1.8100232396  | 0.0854338127  |
|                  | O         | 2.3804190606  | -0.0122573805 | 0.3023157200 | O                | -1.4831611116 | -0.3962769782 | 0.2394011255  | O                                                                                  | 0.0220512978  | -1.8087786194 | 0.0894807326  |
|                  | H         | 2.9981266628  | 0.6990245679  | 0.4606227609 | H                | -1.2809366340 | 0.8414662468  | 0.0628540260  | H                                                                                  | 0.4856318507  | 2.5707131515  | 0.3607239687  |
|                  | H         | 2.8995090136  | -0.8093940078 | 0.2138726540 | H                | -1.7970411131 | -0.8282110496 | 1.0439101110  | H                                                                                  | -0.4837914326 | -2.5726027024 | 0.3582674819  |
| 3 <sup>4</sup> A | Ru        | 0.2104091359  | 0.1544338068  | 0.1958925841 | Ru               | 0.4684035675  | -0.0485514668 | -0.0787520035 | Ru                                                                                 | 0.0000000000  | -0.0000000000 | -0.3147827813 |
|                  | O         | -1.4279710871 | 0.2791354572  | 0.1188174532 | O                | -0.2979492166 | 1.5066039717  | -0.2078747926 | O                                                                                  | -0.0365676735 | -1.4019955602 | 0.8238682012  |
|                  | O         | 2.3438837940  | -0.0084013312 | 0.3007567588 | O                | -1.4521240529 | -0.3519877368 | 0.2177908047  | O                                                                                  | 0.0365676735  | 1.4019955602  | 0.8238682012  |
|                  | H         | 2.9594735797  | 0.7072747790  | 0.4596975735 | H                | -1.3311459138 | 0.7650240732  | 0.1938743616  | H                                                                                  | 0.6071082029  | -1.5123522074 | 1.5252290810  |
|                  | H         | 2.8572172886  | -0.8114477932 | 0.2110803217 | H                | -1.7971004554 | -0.7911614104 | 0.9838325714  | H                                                                                  | -0.6071082029 | 1.5123522074  | 1.5252290810  |
| 4 <sup>4</sup> A | Ru        | 0.2114230239  | 0.1577637855  | 0.1770976202 | Ru               | 0.4878622195  | -0.0561580166 | -0.1147329201 | No convergence. Used the same geometry from 3 <sup>4</sup> A to obtain the energy. |               |               |               |
|                  | O         | -1.4282410551 | 0.2772030891  | 0.1300398923 | O                | -0.3189413921 | 1.5178296324  | -0.1661100740 |                                                                                    |               |               |               |
|                  | O         | 2.3440909581  | -0.0085287115 | 0.2975408208 | O                | -1.3936860865 | -0.3774761743 | 0.2422165240  |                                                                                    |               |               |               |
|                  | H         | 2.9580060326  | 0.7070079213  | 0.4630163617 | H                | -1.3449034601 | 0.7565551411  | 0.1542673490  |                                                                                    |               |               |               |
|                  | H         | 2.8577327517  | -0.8124512114 | 0.2185498116 | H                | -1.8402473519 | -0.7608231516 | 0.9932300626  |                                                                                    |               |               |               |
| 1 <sup>2</sup> A | Ru        | 0.2140659629  | 0.1535778429  | 0.1928763798 | Ru               | 0.4325606692  | -0.1092533966 | -0.0464368770 | Ru                                                                                 | 0.0007814266  | -0.0008489912 | -0.1735403733 |
|                  | O         | -1.5492207686 | 0.2892754525  | 0.1182233657 | O                | -0.2988578432 | 1.5493382193  | -0.1754966050 | O                                                                                  | -0.0695142254 | 1.7334475286  | 0.1216229898  |
|                  | O         | 2.3828499834  | -0.0117962762 | 0.2987293988 | O                | -1.4699475030 | -0.4383291487 | 0.1872471607  | O                                                                                  | 0.0713412314  | -1.7356071691 | 0.1198370481  |
|                  | H         | 2.9980943437  | 0.7039826446  | 0.4474237573 | H                | -1.3377177756 | 0.8944912981  | 0.1062850383  | H                                                                                  | 0.4965207764  | 2.4197989336  | 0.4805516993  |
|                  | H         | 2.8972221898  | -0.8140447908 | 0.2289916049 | H                | -1.7359536184 | -0.8163195410 | 1.0372722246  | H                                                                                  | -0.4991292090 | -2.4167903019 | 0.4815987674  |
| 2 <sup>2</sup> A | Ru        | 0.2133773721  | 0.1529126306  | 0.2016274902 | Ru               | 0.4787506683  | -0.0944034996 | -0.0577355847 | Ru                                                                                 | 0.0014363744  | -0.0322772463 | -0.5240406763 |
|                  | O         | -1.5471534523 | 0.2889840678  | 0.1127683555 | O                | -0.3132716307 | 1.5013499414  | -0.2201746684 | O                                                                                  | -0.1755650997 | 1.6501204186  | 0.1452523439  |
|                  | O         | 2.3820499124  | -0.0112663875 | 0.3004104785 | O                | -1.4705514224 | -0.3701399241 | 0.2523883662  | O                                                                                  | 0.1720798562  | -1.6533549688 | 0.1453366922  |
|                  | H         | 2.9988668037  | 0.7036966806  | 0.4467010694 | H                | -1.3293902860 | 0.9293732759  | 0.1346253173  | H                                                                                  | 0.5105855983  | 2.1298969705  | 0.6329462276  |
|                  | H         | 2.8958710749  | -0.8133321185 | 0.2247371130 | H                | -1.7754534003 | -0.8862523626 | 0.9997675110  | H                                                                                  | -0.5085367292 | -2.0943851744 | 0.6305756179  |
| 1 <sup>6</sup> A | Ru        | 0.2204462185  | 0.1548714693  | 0.1931586192 | Ru               | 0.7342920567  | -0.3476735455 | -0.1663128690 | Ru                                                                                 | -0.0005979292 | 0.0001338717  | -0.0230623355 |
|                  | O         | -1.5670136433 | 0.2877008883  | 0.1174502585 | O                | -0.0258147724 | 1.6043626866  | -0.2904482579 | O                                                                                  | 0.2209794336  | 1.8210689842  | 0.0216265870  |
|                  | O         | 2.3864445070  | -0.0100793965 | 0.3011379337 | O                | -1.2640118170 | -0.2212759617 | 0.2530828359  | O                                                                                  | -0.2215313635 | -1.8208280392 | 0.0220472330  |
|                  | H         | 3.0056202203  | 0.7029501952  | 0.4506018626 | H                | -0.9933111871 | 0.9211836442  | 0.0824994892  | H                                                                                  | 0.3217551819  | 2.6354234757  | 0.5048686447  |
|                  | H         | 2.8975144088  | -0.8144482833 | 0.2238958327 | H                | -1.7460177961 | -0.5869394301 | 1.0729277708  | H                                                                                  | -0.3206053228 | -2.6357982925 | 0.5045900021  |

All other structures are optimized at MRCI/cc-pVTZ-PP(Ru) cc-pVTZ(H) aug-cc-pVTZ(O).



**Table S9.** Harmonic vibrational frequencies (cm<sup>-1</sup>) of MRCI optimal geometries given in Table S8

|                       | Reactants                                                         | Transition States                                                   | Products                                                         |
|-----------------------|-------------------------------------------------------------------|---------------------------------------------------------------------|------------------------------------------------------------------|
| <b>1<sup>4</sup>A</b> | 89.5, 107.6, 344.2, 349.3, 572.9, 1147.6, 1735.4, 3931.7, 4007.5  | 1864.4i, 479.0, 602.6, 668.1, 890.8, 974.8, 1300.9, 1977.9, 3956.2  | 129.4, 161.5, 231.6, 558.4, 594.8, 822.6, 826.3, 3968.9, 3983.4  |
| <b>2<sup>4</sup>A</b> | 72.8, 119.0, 340.7, 349.2, 573.8, 1147.9, 1736.0, 3931.9, 4007.7  | 1984.6i, 449.2, 559.2, 618.8, 830.4, 925.4, 1255.2, 1974.7, 3830.5  | 134.4, 157.6, 243.0, 553.8, 597.9, 822.2, 825.7, 3968.1, 3982.6  |
| <b>3<sup>4</sup>A</b> | 18.7i, 154.8, 400.9, 434.8, 609.2, 1052.0, 1731.1, 3903.6, 3978.5 | 1297.2i, 443.1, 523.7, 710.7, 839.8, 973.7, 1349.7, 2163.7, 4067.2  | 279.8, 522.0, 530.0, 751.9, 879.1, 986.0, 2153.7, 3922.4, 3968.4 |
| <b>4<sup>4</sup>A</b> | 55.1, 143.3, 400.4, 435.6, 608.9, 1053.9, 1730.9, 3904.4, 3979.3  | 1647.5i, 400.0, 496.2, 719.6, 775.4, 874.0, 1278.8, 2090.5, 3979.8  | -                                                                |
| <b>1<sup>2</sup>A</b> | 107.7, 183.3, 349.6, 374.5, 622.6, 675.0, 1739.7, 3926.6, 4003.9  | 1891.8i, 464.6, 555.7, 672.4, 769.8, 944.7, 1326.1, 1797.0, 3799.1  | 92.8, 397.2, 524.9, 604.3, 690.7, 855.5, 865.9, 3902.1, 3918.6   |
| <b>2<sup>2</sup>A</b> | 111.7, 184.2, 350.7, 375.2, 584.5, 675.2, 1740.9, 3926.7, 4003.5  | 1764.1i, 470.2, 554.9, 592.3, 732.3, 944.8, 1346.9, 1848.5, 3926.1  | 164.2, 589.7, 632.1, 795.8, 927.9, 999.4, 1106.5, 3905.5, 4194.0 |
| <b>1<sup>6</sup>A</b> | 100.7, 165.3, 358.8, 379.4, 615.9, 635.7, 1735.3, 3919.0, 3995.5  | 1487.1i, 400.8, 513.7, 714.5, 971.8, 1030.7, 1274.6, 1871.3, 3175.6 | 91.8, 125.4, 194.4, 331.1, 412.2, 776.2, 841.9, 4006.5, 4020.3   |

**Table S10.** Total energies (a.u.) of optimal geometries of the reactants, transition state, and products of the RuO<sup>+</sup> + H<sub>2</sub>O → Ru(OH)<sub>2</sub><sup>+</sup> reaction for the first four quartets (1<sup>4</sup>A, 2<sup>4</sup>A, 3<sup>4</sup>A, 4<sup>4</sup>A), the first two doublet (1<sup>2</sup>A, 2<sup>2</sup>A), and the first sextet (1<sup>6</sup>A) states.

| State            | Total energy of RuO <sup>+</sup> + H <sub>2</sub> O reacting products (a.u.) |             |             |             |             |             |
|------------------|------------------------------------------------------------------------------|-------------|-------------|-------------|-------------|-------------|
|                  | Intermediate                                                                 |             | TS          |             | Products    |             |
|                  | MRCI                                                                         | MRCI+Q      | MRCI        | MRCI+Q      | MRCI        | MRCI+Q      |
| 1 <sup>4</sup> A | -245.110452                                                                  | -245.208999 | -245.053952 | -245.154271 | -245.101846 | -245.191876 |
| 2 <sup>4</sup> A | -245.110370                                                                  | -245.208921 | -245.041200 | -245.142492 | -245.101758 | -245.191783 |
| 3 <sup>4</sup> A | -245.098670                                                                  | -245.201180 | -245.030675 | -245.133822 | -245.096016 | -245.191904 |
| 4 <sup>4</sup> A | -245.098315                                                                  | -245.200911 | -245.012842 | -245.112806 | -245.068340 | -245.163550 |
| 1 <sup>2</sup> A | -245.074994                                                                  | -245.160251 | -245.039493 | -245.130859 | -245.098378 | -245.193448 |
| 2 <sup>2</sup> A | -245.074782                                                                  | -245.160289 | -245.040073 | -245.131031 | -245.066715 | -245.155556 |
| 1 <sup>6</sup> A | -245.103974                                                                  | -245.187976 | -245.039990 | -245.118894 | -245.116742 | -245.201722 |

**Table S11.** MRCI optimal geometries (Cartesian coordinates in Å) of the reactants, transition state, and products of the  $\text{RuO}^- + \text{H}_2\text{O} \rightarrow \text{Ru}(\text{OH})_2^-$  reaction for the first two quartet ( $1^4\text{A}$ ,  $2^4\text{A}$ ) and the first two doublet ( $1^2\text{A}$ ,  $2^2\text{A}$ ) states.

|               | Reactants                                                        |               |               | Transition State                                                 |                                                                  |               | Products                                                         |               |               |               |               |               |
|---------------|------------------------------------------------------------------|---------------|---------------|------------------------------------------------------------------|------------------------------------------------------------------|---------------|------------------------------------------------------------------|---------------|---------------|---------------|---------------|---------------|
| $1^4\text{A}$ | Ru                                                               | -0.8857945363 | 1.0645114228  | -0.3069587976                                                    | Ru                                                               | 0.485839      | -0.159057                                                        | -0.000326     | Ru            | 0.0003370622  | -0.0000982877 | 0.0005737372  |
|               | O                                                                | 0.6245034977  | 0.2869708114  | 0.0299249010                                                     | O                                                                | -0.420263     | 1.394287                                                         | 0.018152      | O             | -0.0819286493 | 1.9851694891  | -0.0608584392 |
|               | H                                                                | 0.0826828257  | -2.6898045530 | 0.4135758395                                                     | O                                                                | -1.830459     | -0.508984                                                        | -0.110660     | O             | 0.0816979363  | -1.9854162074 | -0.0611852507 |
|               | H                                                                | 0.9296416121  | -1.4733449118 | 0.1607088731                                                     | H                                                                | -1.352388     | 0.697989                                                         | -0.044240     | H             | 0.4946424357  | 2.3884116991  | 0.5756843853  |
|               | O                                                                | 0.9926019258  | -2.4421221186 | 0.2721474844                                                     | H                                                                | -2.018748     | -0.781895                                                        | 0.798662      | H             | -0.4947487849 | -2.3880666929 | 0.5758556986  |
| $2^4\text{A}$ | Ru                                                               | -0.8726985663 | 1.0692807984  | -0.3604450050                                                    | Used the $1^4\text{A}$ geometry to do a single point calculation |               |                                                                  | Ru            | 0.0003232048  | -0.0001041286 | -0.0003727837 |               |
|               | O                                                                | 0.6248390029  | 0.2807316405  | 0.0056928271                                                     |                                                                  |               |                                                                  | O             | -0.0828165854 | 1.9855231292  | -0.0584966078 |               |
|               | H                                                                | 0.0725591234  | -2.6853670750 | 0.4271995979                                                     |                                                                  |               |                                                                  | O             | 0.0826018446  | -1.9857834836 | -0.0588343396 |               |
|               | H                                                                | 0.9314212287  | -1.4757313507 | 0.1845118385                                                     |                                                                  |               |                                                                  | H             | 0.4959554075  | 2.3918488030  | 0.5737995051  |               |
|               | O                                                                | 0.9875145364  | -2.4427033621 | 0.3124390422                                                     |                                                                  |               |                                                                  | H             | -0.4960638714 | -2.3914843200 | 0.5739743572  |               |
| $1^2\text{A}$ | O                                                                | 0.0000000000  | -0.0000000000 | -3.4891347208                                                    | Ru                                                               | -0.1395744489 | 0.0001185510                                                     | -0.3838717944 | Ru            | 0.0000000000  | -0.0000000000 | -0.0113729502 |
|               | H                                                                | 0.0000000000  | -0.7455490452 | -2.8949850242                                                    | O                                                                | 1.4679177158  | -0.0082136424                                                    | 0.4708909979  | O             | -0.0611910050 | 1.9198415151  | 0.0324467192  |
|               | H                                                                | 0.0000000000  | 0.7455490452  | -2.8949850242                                                    | O                                                                | -0.5615958556 | 0.0586721584                                                     | 1.7350038604  | O             | 0.0611910050  | -1.9198415151 | 0.0324467192  |
|               | Ru                                                               | 0.0000000000  | -0.0000000000 | 0.2961388484                                                     | H                                                                | 0.4413355644  | 0.0312186117                                                     | 1.5825322270  | H             | 0.8154630588  | 2.2867447398  | 0.0551659845  |
|               | O                                                                | 0.0000000000  | -0.0000000000 | 1.9831525594                                                     | H                                                                | -0.8320497102 | -0.8440526368                                                    | 1.8947859342  | H             | -0.8154630588 | -2.2867447398 | 0.0551659845  |
| $2^2\text{A}$ | Used the $1^2\text{A}$ geometry to do a single point calculation |               |               | Used the $1^2\text{A}$ geometry to do a single point calculation |                                                                  |               | Used the $1^2\text{A}$ geometry to do a single point calculation |               |               |               |               |               |

The grey highlighted structures are optimized at MRCI/aug-cc-pVDZ-PP(Ru) cc-pVDZ(H) aug-cc-pVDZ(O). All other structures are optimized at MRCI/aug-cc-pVTZ-PP(Ru) cc-pVTZ(H) aug-cc-pVTZ(O). The green highlighted structure is optimized at DFT-MN15/ aug-cc-pVDZ-PP(Ru) cc-pVDZ(H) aug-cc-pVDZ(O).

**Table S12.** Total energies (a.u.) of optimal geometries of the reactants, transition state, and products of the  $\text{RuO}^- + \text{H}_2\text{O} \rightarrow \text{Ru}(\text{OH})_2^-$  reaction for the first two quartet ( $1^4\text{A}$ ,  $2^4\text{A}$ ) and the first two doublet ( $1^2\text{A}$ ,  $2^2\text{A}$ ) states.

| State         | Total energy of $\text{RuO}^- + \text{H}_2\text{O}$ reacting products (a.u.) |             |             |             |             |             |
|---------------|------------------------------------------------------------------------------|-------------|-------------|-------------|-------------|-------------|
|               | Intermediate                                                                 |             | TS          |             | Products    |             |
|               | MRCI                                                                         | MRCI+Q      | MRCI        | MRCI+Q      | MRCI        | MRCI+Q      |
| $1^4\text{A}$ | -245.424785                                                                  | -245.530067 | -245.382325 | -245.485853 | -245.498484 | -245.593741 |
| $2^4\text{A}$ | -245.424744                                                                  | -245.530022 | -245.380955 | -245.484964 | -245.498367 | -245.593536 |
| $1^2\text{A}$ | -245.410662                                                                  | -245.499918 | -245.372464 | -245.476123 | -245.457301 | -245.556542 |
| $2^2\text{A}$ | -245.410309                                                                  | -245.499555 | -245.360603 | -245.466479 | -245.448781 | -245.549738 |

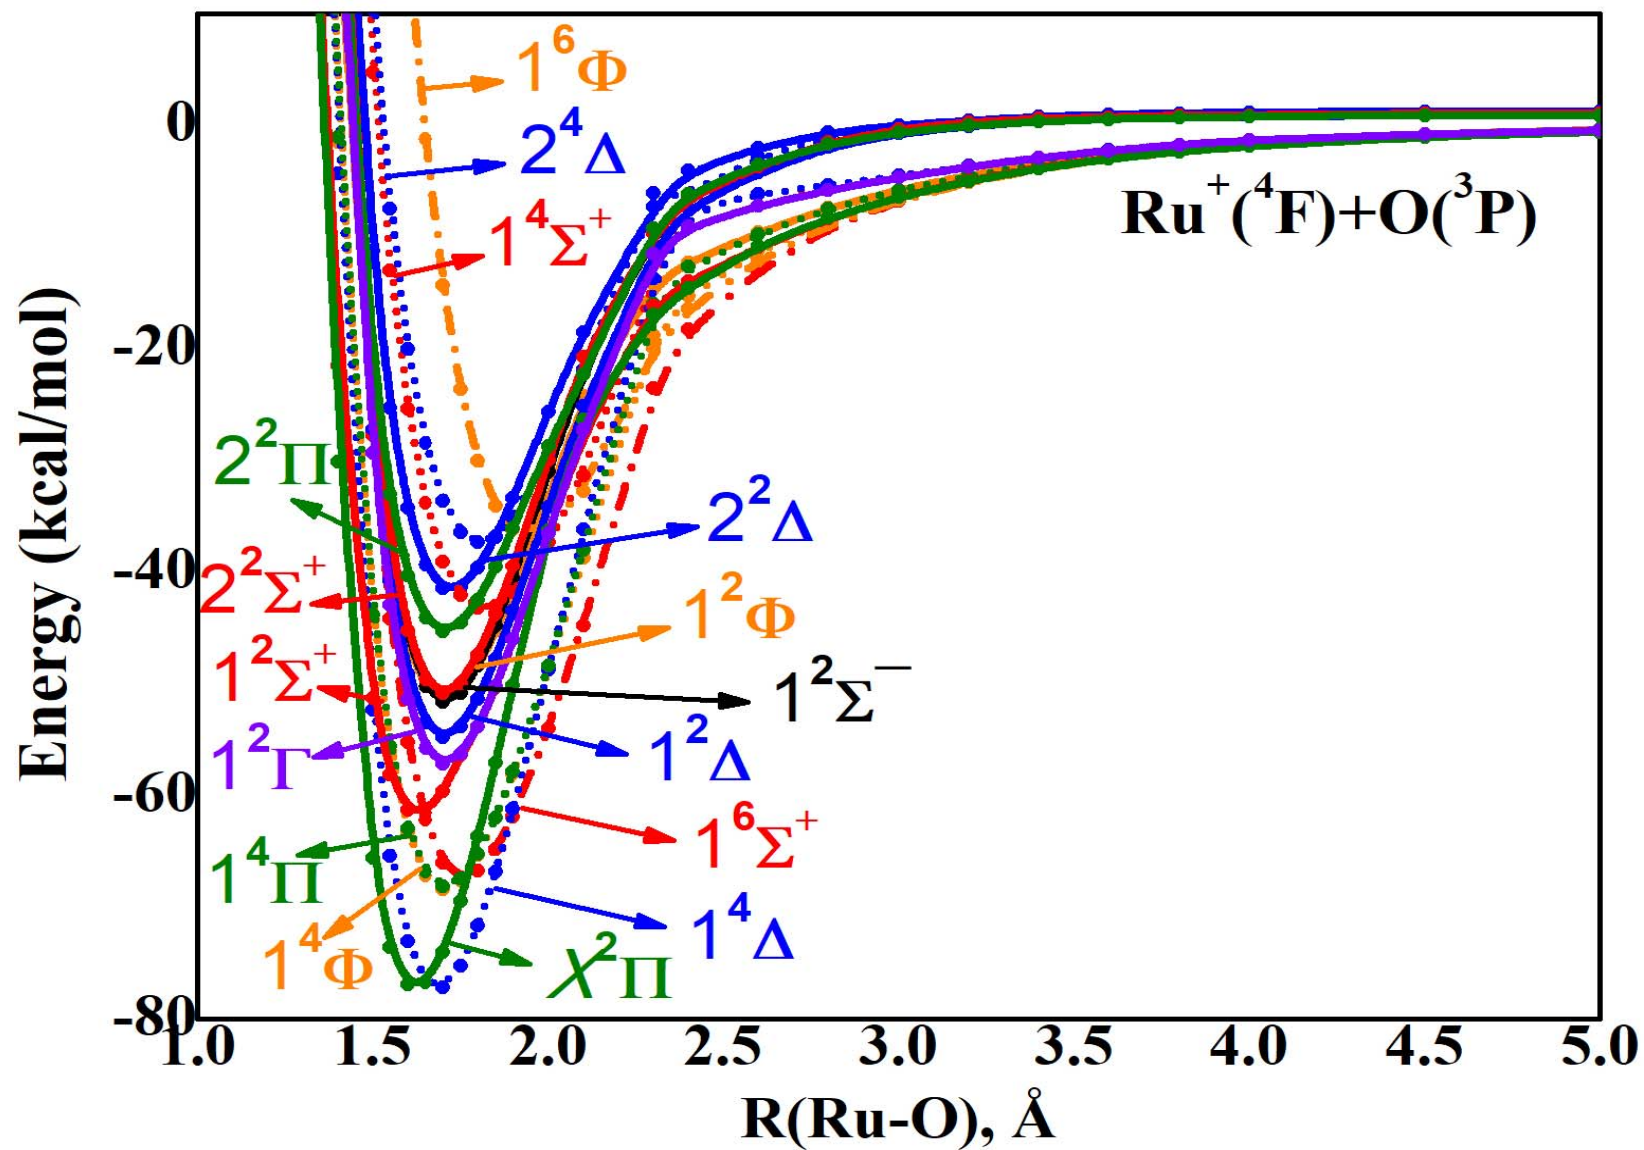

Figure S1. Potential energy curves of  $\text{RuO}^+$  as a function of the Ru-O distance at the MRCI level of theory.

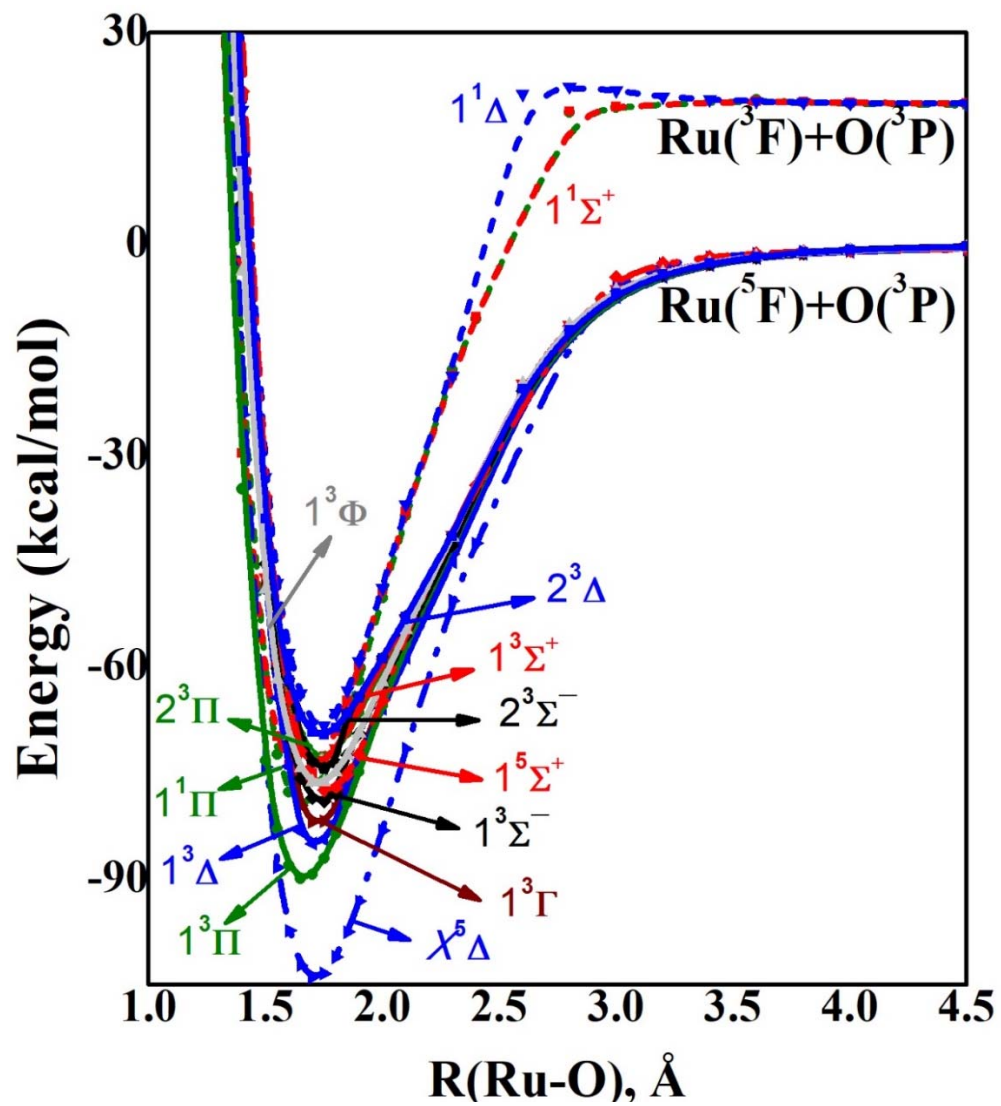

Figure S2. Potential energy curves of RuO as a function of the Ru-O distance at the MRCI level of theory.

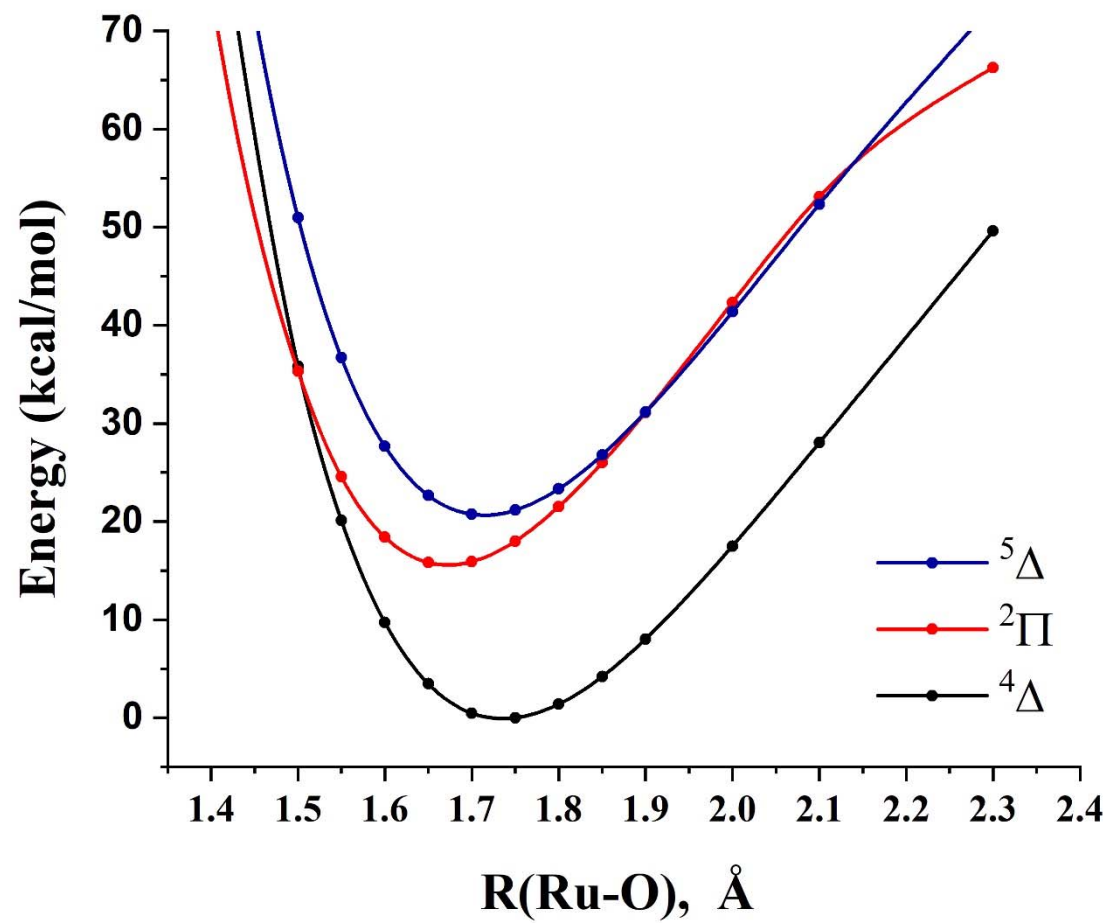

Figure S3. Potential energy curves of RuO<sup>-</sup> as a function of the Ru-O distance at the MRCI level of theory.
